# Supplementary material for: The Anti-Breast Cancer Stem Cell Potency of Copper(I)-Non-Steroidal Anti-Inflammatory Drug Complexes
Source: MDPI journal article supplement (doi:10.3390/molecules28176401), 2023-09-01
Supplement: s1 [file s1]

## Supporting Information for

# The anti-breast cancer stem cell potency of copper(I)-non-steroidal anti-inflammatory drugs complexes

Alice Johnson <sup>1,2,†</sup>, Xiao Feng <sup>1,†</sup>, Kuldip Singh <sup>1</sup>, Fabrizio Ortu <sup>1,\*</sup> and Kogularaman Suntharalingam <sup>1,\*</sup>

<sup>1</sup> School of Chemistry, University of Leicester, Leicester LE1 7RH, UK; alice.johnson@shu.ac.uk (A.J.); xf40@leicester.ac.uk (X.F.); ks42@leicester.ac.uk (K.S.)

<sup>2</sup> Biomolecular Sciences Research Centre, Sheffield Hallam University, Sheffield S1 1WB, UK

\* Correspondence: fabrizio.ortu@leicester.ac.uk (F.O.); k.suntharalingam@leicester.ac.uk (K.S.); Tel.: +44-(0)116-294-4670 (F.O.); +44-(0)116-294-4562 (K.S.)

† These authors contributed equally to this work.

### Table of Content

|                    |                                                                                                                                                                                                          |
|--------------------|----------------------------------------------------------------------------------------------------------------------------------------------------------------------------------------------------------|
| <b>Figure S1.</b>  | <sup>1</sup> H NMR spectrum of <b>1</b> in CD <sub>2</sub> Cl <sub>2</sub> .                                                                                                                             |
| <b>Figure S2.</b>  | <sup>31</sup> P{ <sup>1</sup> H} NMR spectrum of <b>1</b> in CD <sub>2</sub> Cl <sub>2</sub> .                                                                                                           |
| <b>Figure S3.</b>  | <sup>1</sup> H NMR spectrum of <b>2</b> in CD <sub>2</sub> Cl <sub>2</sub> .                                                                                                                             |
| <b>Figure S4.</b>  | <sup>31</sup> P{ <sup>1</sup> H} NMR spectrum of <b>2</b> in CD <sub>2</sub> Cl <sub>2</sub> .                                                                                                           |
| <b>Figure S5.</b>  | <sup>1</sup> H NMR spectrum of <b>3</b> in CD <sub>2</sub> Cl <sub>2</sub> .                                                                                                                             |
| <b>Figure S6.</b>  | <sup>31</sup> P{ <sup>1</sup> H} NMR spectrum of <b>3</b> in CD <sub>2</sub> Cl <sub>2</sub> .                                                                                                           |
| <b>Figure S7.</b>  | <sup>31</sup> P{ <sup>1</sup> H} NMR spectrum of free triphenylphosphine in CD <sub>2</sub> Cl <sub>2</sub> .                                                                                            |
| <b>Figure S8.</b>  | High resolution ESI mass spectrum (positive mode) of <b>1</b> .                                                                                                                                          |
| <b>Figure S9.</b>  | High resolution ESI mass spectrum (positive mode) of <b>2</b> .                                                                                                                                          |
| <b>Figure S10.</b> | High resolution ESI mass spectrum (positive mode) of <b>3</b> .                                                                                                                                          |
| <b>Figure S11.</b> | ATR-FTIR spectra of <b>1-3</b> (A-C) in the solid form.                                                                                                                                                  |
| <b>Table S1.</b>   | Crystallographic data for complexes <b>2</b> and <b>3</b> .                                                                                                                                              |
| <b>Table S2.</b>   | Experimentally determined LogP values for <b>1-3</b> .                                                                                                                                                   |
| <b>Figure S12.</b> | Representative dose-response curves for the treatment of HMLER and HMLER-shEcad cells with <b>1</b> after 72 h incubation.                                                                               |
| <b>Figure S13.</b> | Representative dose-response curves for the treatment of HMLER and HMLER-shEcad cells with <b>2</b> after 72 h incubation.                                                                               |
| <b>Figure S14.</b> | Representative dose-response curves for the treatment of HMLER and HMLER-shEcad cells with <b>3</b> after 72 h incubation.                                                                               |
| <b>Figure S15.</b> | Representative dose-response curves for the treatment of HMLER and HMLER-shEcad cells with sodium salicylate after 72 h incubation.                                                                      |
| <b>Table S3.</b>   | IC <sub>50</sub> values of diclofenac, naproxen, and sodium salicylate against HMLER and HMLER-shEcad cells. <sup>1</sup> Determined after 72 h incubation (mean of three independent experiments ± SD). |

- Figure S16.** Representative dose-response curves for the treatment of BEAS-2B cells with **1-3** after 72 h incubation.
- Figure S17.** Representative dose-response curves for the treatment of HMLER-shEcad mammospheres with **1-3** after 5 days incubation.
- Figure S18.** Normalised ROS activity in untreated HMLER-shEcad cells (control) and HMLER-shEcad cells treated with **1** ( $2 \times \text{IC}_{50}$  value, 0.5-24 h).
- Figure S19.** Normalised ROS activity in untreated HMLER-shEcad cells (control) and HMLER-shEcad cells treated with **2** ( $2 \times \text{IC}_{50}$  value, 0.5-24 h).

## **References**

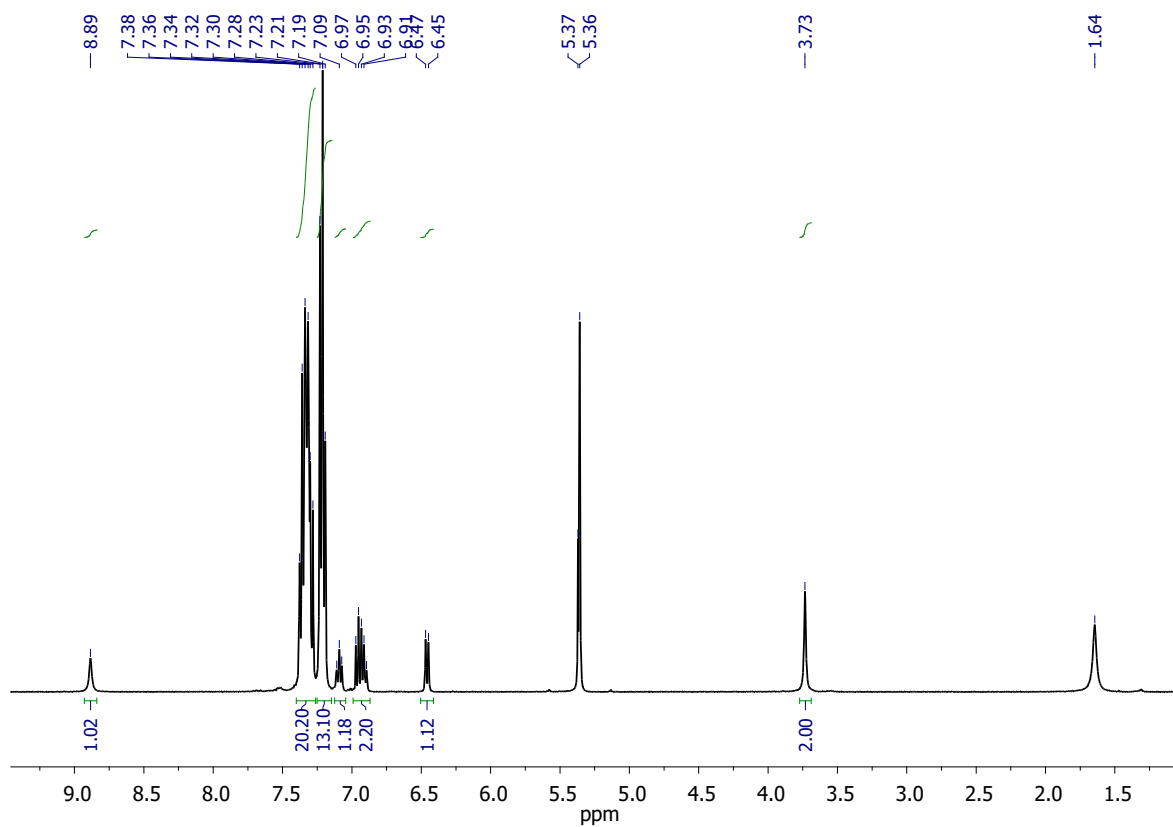

**Figure S1.** <sup>1</sup>H NMR spectrum of **1** in CD<sub>2</sub>Cl<sub>2</sub>.

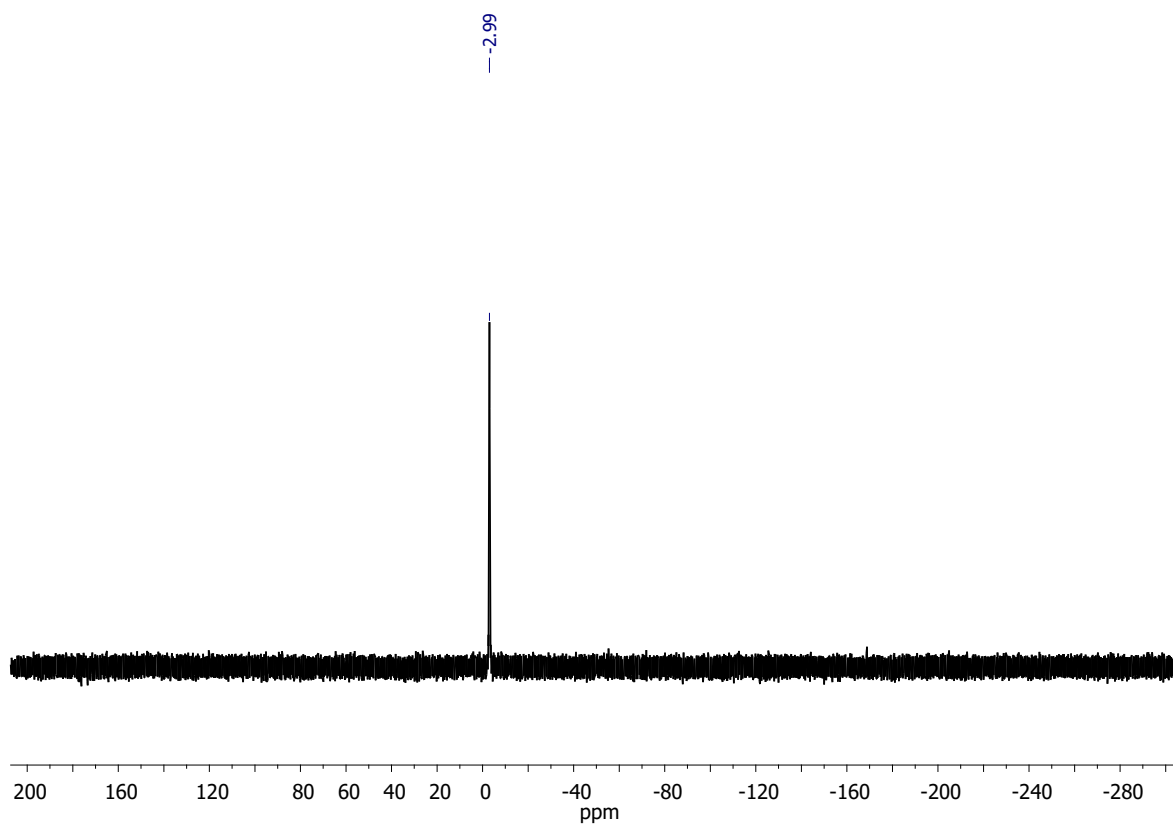

**Figure S2.** <sup>31</sup>P{<sup>1</sup>H} NMR spectrum of **1** in CD<sub>2</sub>Cl<sub>2</sub>.

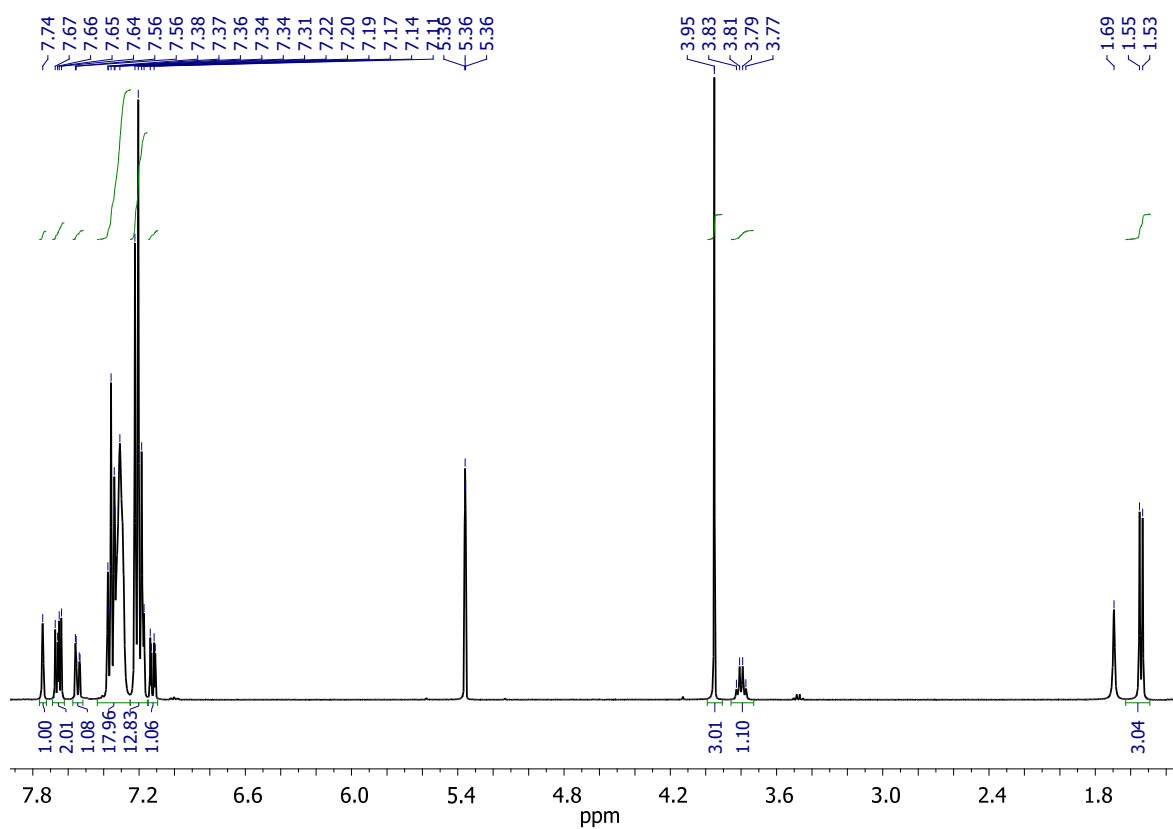

**Figure S3.** <sup>1</sup>H NMR spectrum of **2** in CD<sub>2</sub>Cl<sub>2</sub>.

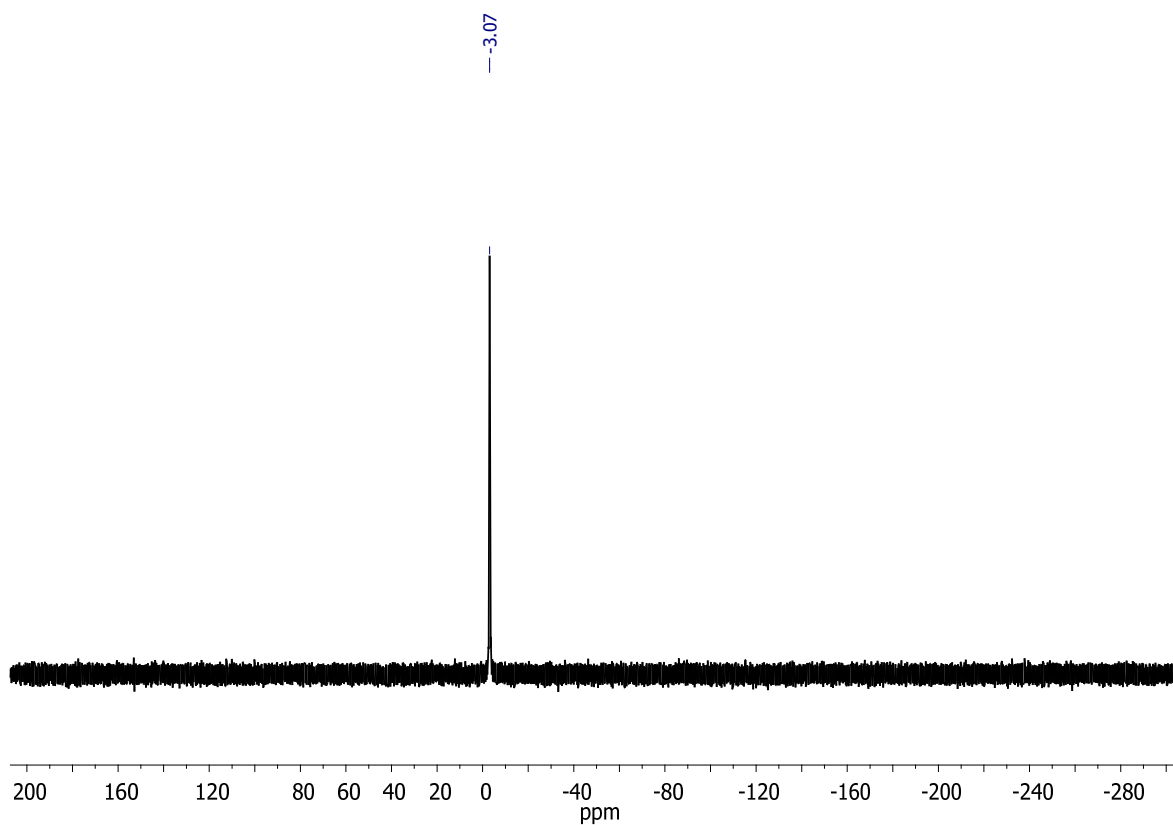

**Figure S4.** <sup>31</sup>P{<sup>1</sup>H} NMR spectrum of **2** in CD<sub>2</sub>Cl<sub>2</sub>.

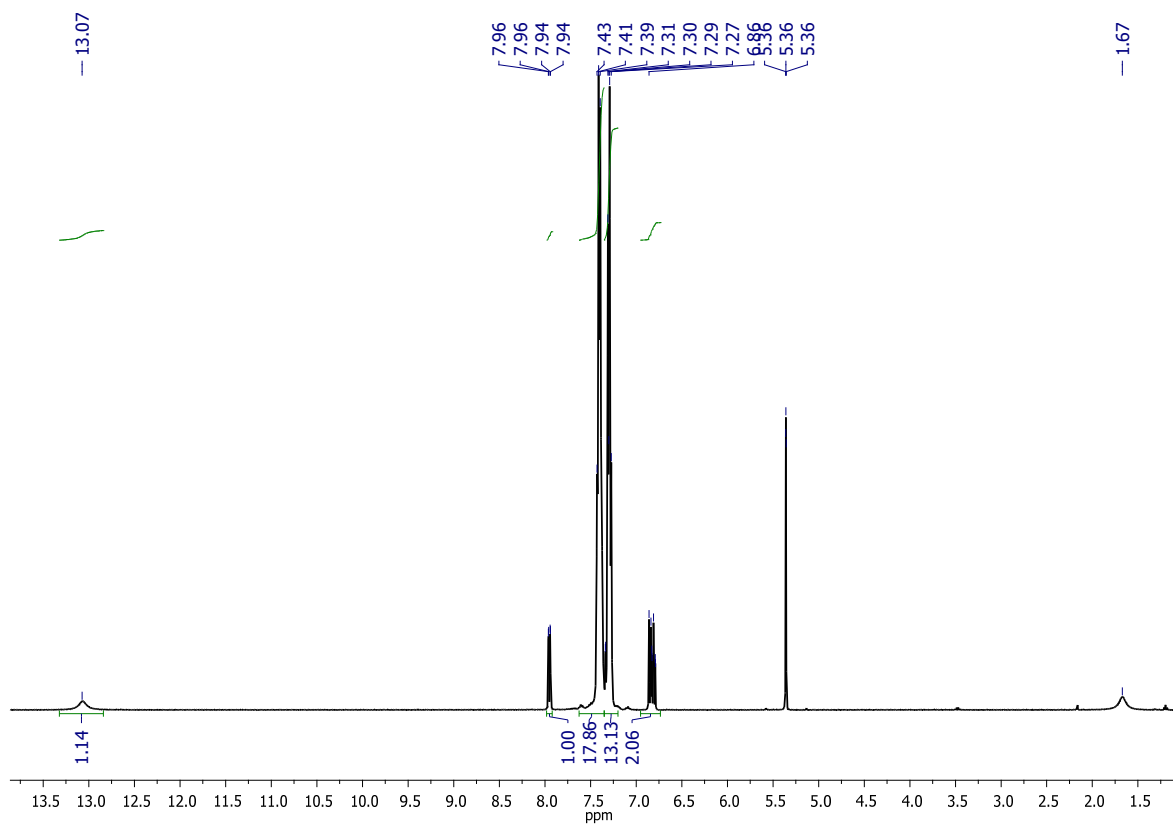

**Figure S5.**  $^1\text{H}$  NMR spectrum of **3** in  $\text{CD}_2\text{Cl}_2$ .

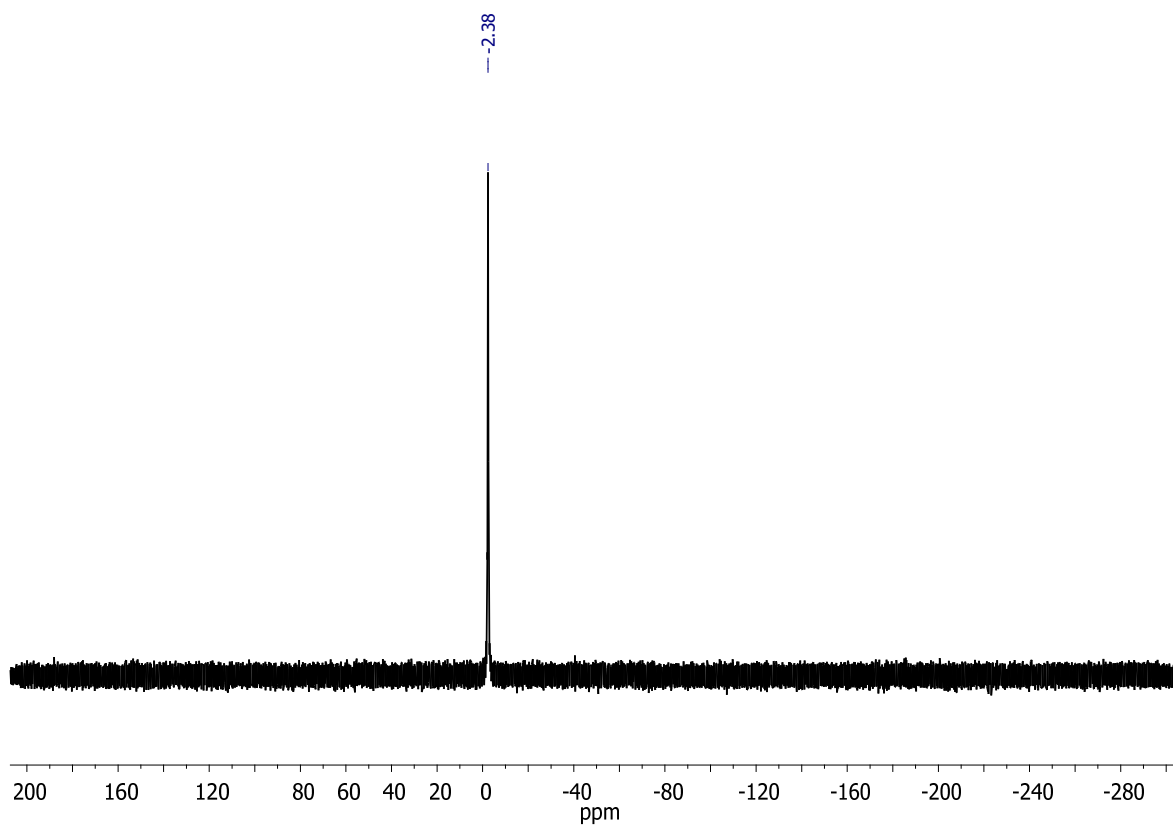

**Figure S6.**  $^{31}\text{P}\{^1\text{H}\}$  NMR spectrum of **3** in  $\text{CD}_2\text{Cl}_2$ .

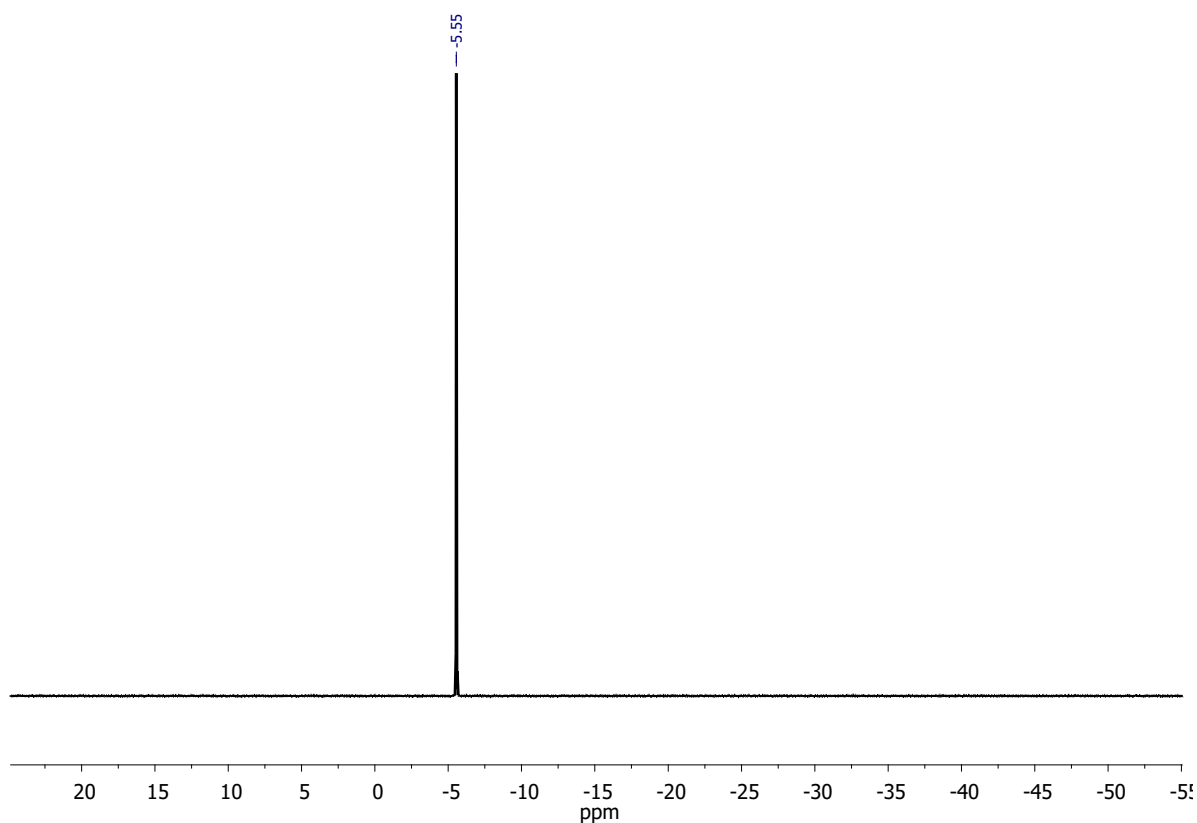

**Figure S7.**  $^{31}\text{P}\{^1\text{H}\}$  NMR spectrum of free triphenylphosphine in  $\text{CD}_2\text{Cl}_2$ .

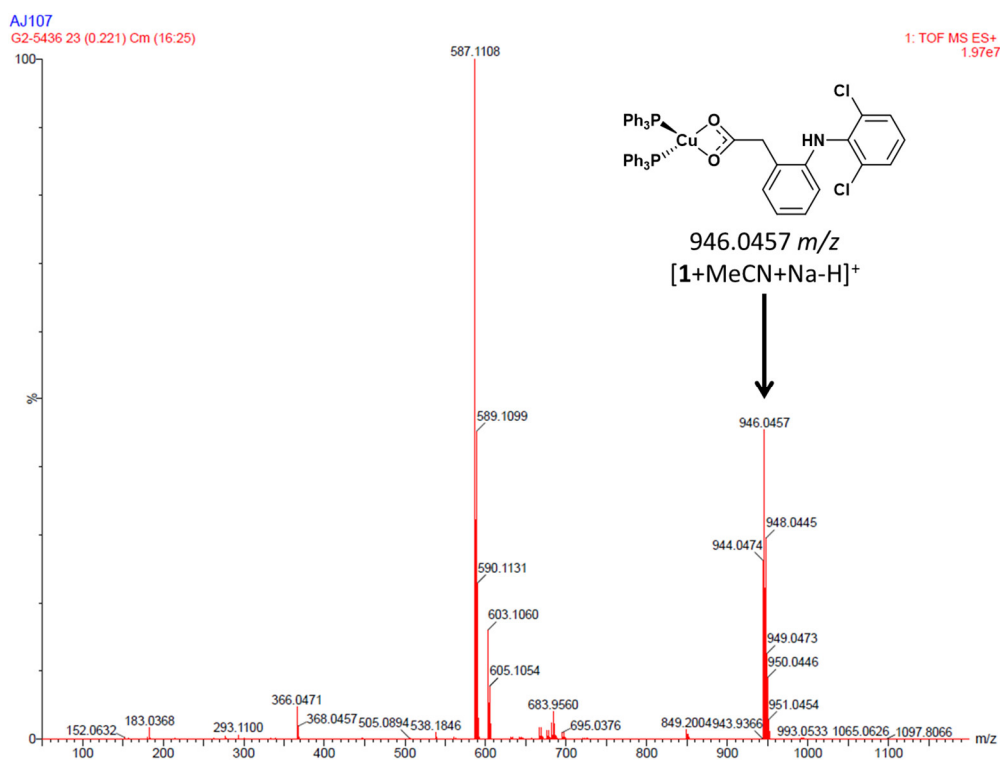

**Figure S8.** High resolution ESI mass spectrum (positive mode) of **1**.

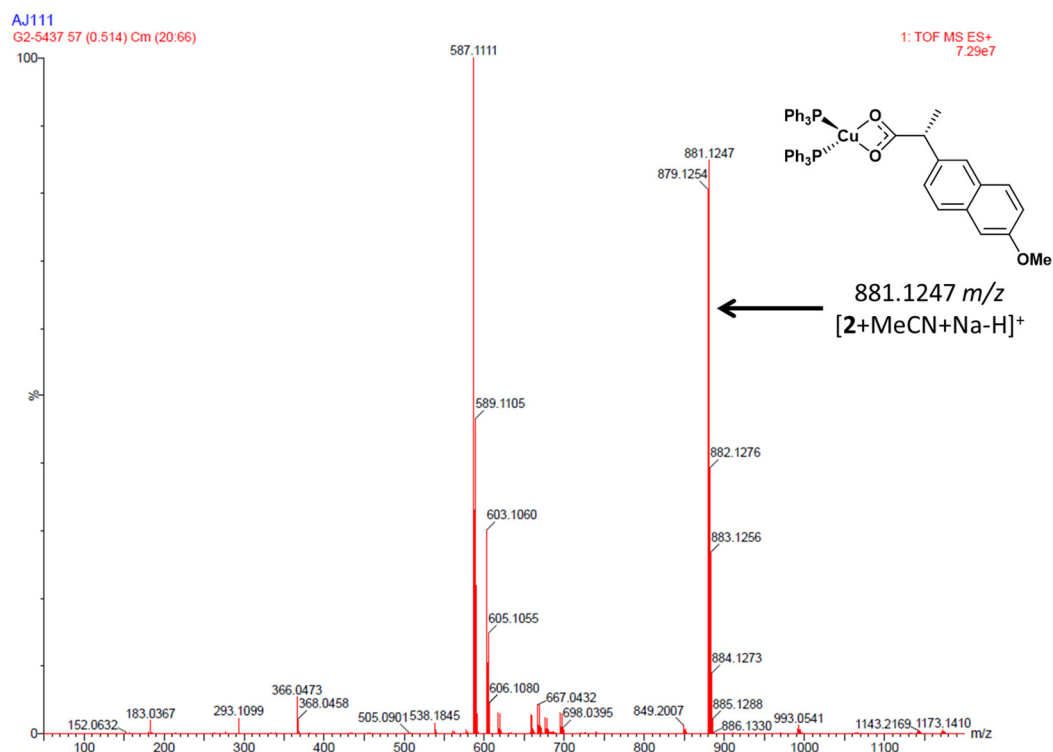

**Figure S9.** High resolution ESI mass spectrum (positive mode) of **2**.

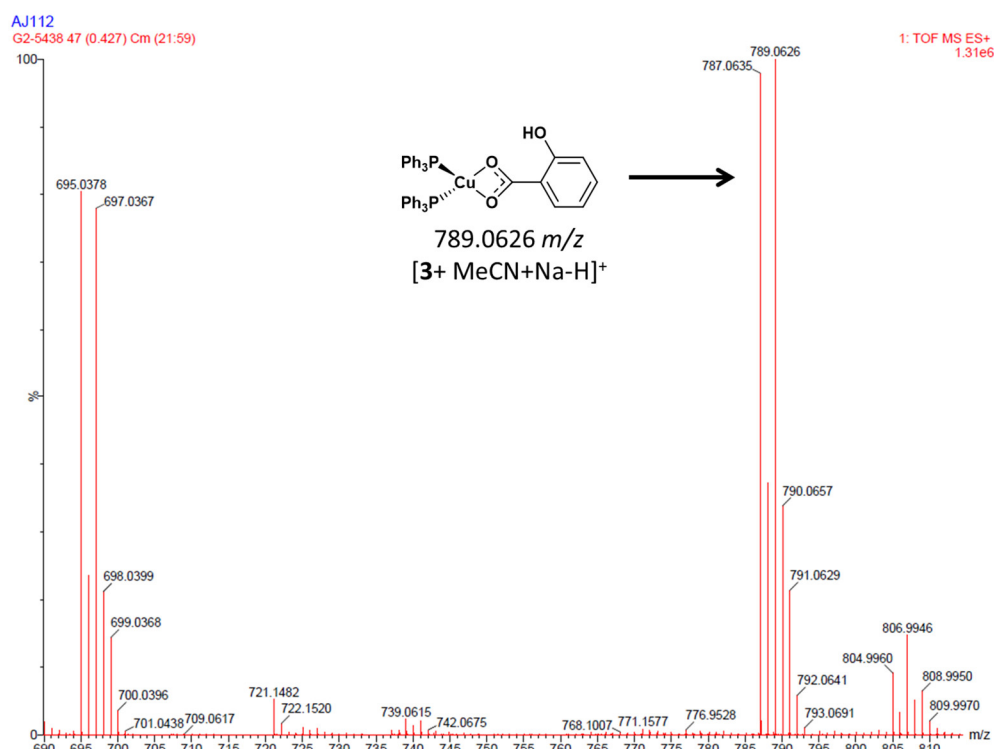

**Figure S10.** High resolution ESI mass spectrum (positive mode) of **3**.

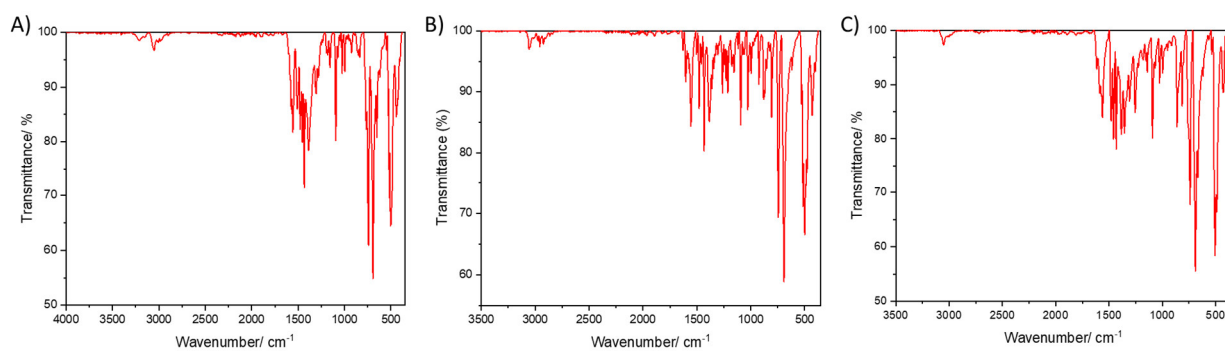

**Figure S11.** ATR-FTIR spectra of **1-3** (A-C) in the solid form.



**Table S1.** Crystallographic data for complexes **2** and **3**.

| <b>Metal complex</b>                                                                  | <b>2</b>                                                        | <b>3</b>                                                        |
|---------------------------------------------------------------------------------------|-----------------------------------------------------------------|-----------------------------------------------------------------|
| CCDC No.                                                                              | 2284762                                                         | 2284763                                                         |
| formula                                                                               | C <sub>50</sub> H <sub>43</sub> CuO <sub>3</sub> P <sub>2</sub> | C <sub>43</sub> H <sub>35</sub> CuO <sub>3</sub> P <sub>2</sub> |
| <i>F</i> <sub>w</sub>                                                                 | 817.32                                                          | 725.19                                                          |
| Crystal system                                                                        | Triclinic                                                       | Monoclinic                                                      |
| Space group                                                                           | <i>P</i> -1                                                     | <i>P</i> 2 <sub>1</sub> / <i>c</i>                              |
| <i>a</i> , Å                                                                          | 12.432(5)                                                       | 15.354(5)                                                       |
| <i>b</i> , Å                                                                          | 12.788(5)                                                       | 14.482(5)                                                       |
| <i>c</i> , Å                                                                          | 15.882(7)                                                       | 17.618(6)                                                       |
| <i>α</i> , deg.                                                                       | 71.055(7)                                                       | 90                                                              |
| <i>β</i> , deg.                                                                       | 87.972(8)                                                       | 113.502(6)                                                      |
| <i>γ</i> , deg.                                                                       | 62.694(7)                                                       | 90                                                              |
| <i>V</i> , Å <sup>3</sup>                                                             | 2102.5(15)                                                      | 3593(2)                                                         |
| <i>Z</i>                                                                              | 2                                                               | 4                                                               |
| <i>D</i> <sub>calcd</sub> , Mg/m <sup>3</sup>                                         | 1.291                                                           | 1.341                                                           |
| 2 <i>θ</i> / deg.                                                                     | 2.736 to 51.998                                                 | 2.892 to 51.994                                                 |
| Reflections collected                                                                 | 16442                                                           | 27590                                                           |
| Independent reflections                                                               | 8144                                                            | 7043                                                            |
| Goodness-of-fit on <i>F</i> <sup>2</sup>                                              | 0.959                                                           | 0.852                                                           |
| <i>R</i> <sub>1</sub> , w <i>R</i> <sub>2</sub> [ <i>I</i> ≥ 2 <i>σ</i> ( <i>I</i> )] | 0.0574, 0.1164                                                  | 0.0579, 0.1016                                                  |
| <i>R</i> <sub>1</sub> , w <i>R</i> <sub>2</sub> [all data]                            | 0.0930, 0.1268                                                  | 0.1366, 0.1205                                                  |

**Table S2.** Experimentally determined LogP values for **1-3**.

| Copper(I) complex | LogP             |
|-------------------|------------------|
| <b>1</b>          | $1.25 \pm 0.06$  |
| <b>2</b>          | $1.00 \pm 0.09$  |
| <b>3</b>          | $0.82 \pm 0.002$ |

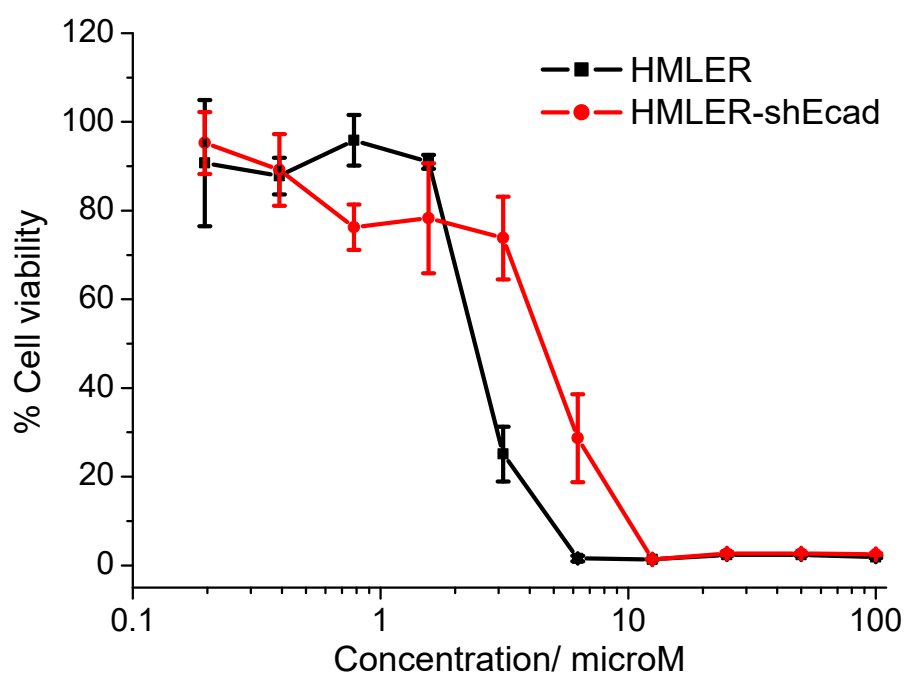

**Figure S12.** Representative dose-response curves for the treatment of HMLER and HMLER-shEcad cells with **1** after 72 h incubation.

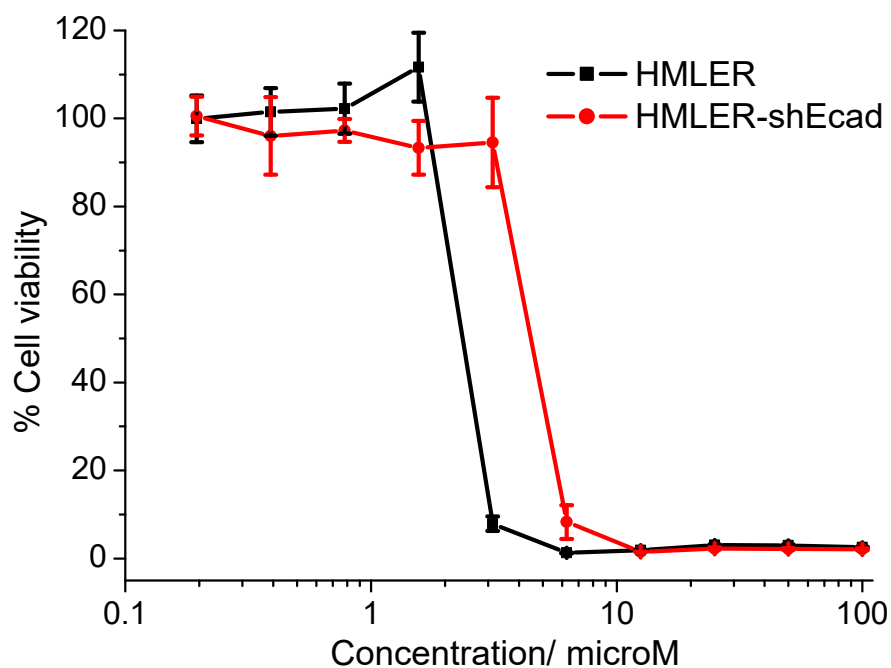

**Figure S13.** Representative dose-response curves for the treatment of HMLER and HMLER-shEcad cells with **2** after 72 h incubation.

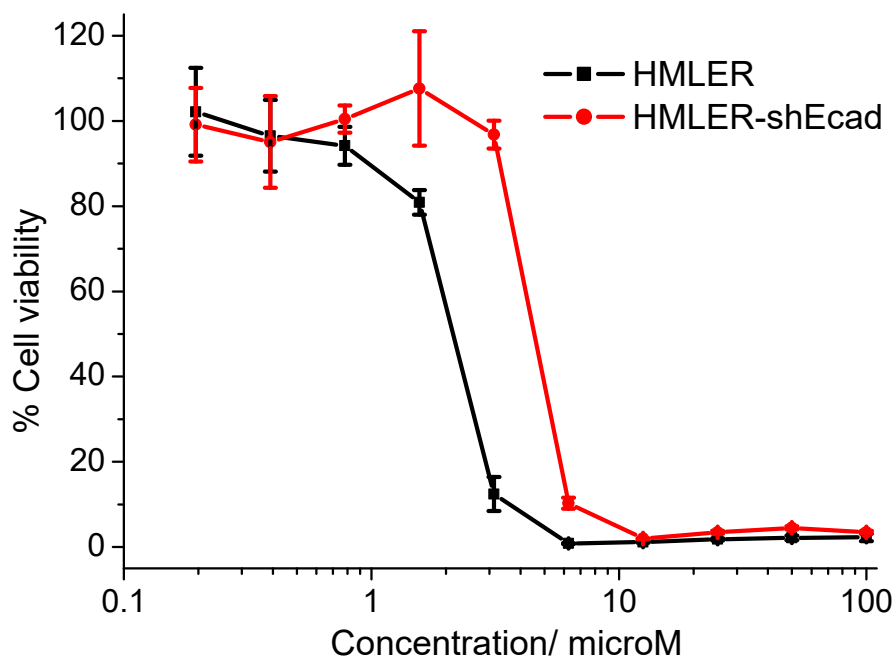

**Figure S14.** Representative dose-response curves for the treatment of HMLER and HMLER-shEcad cells with **3** after 72 h incubation.

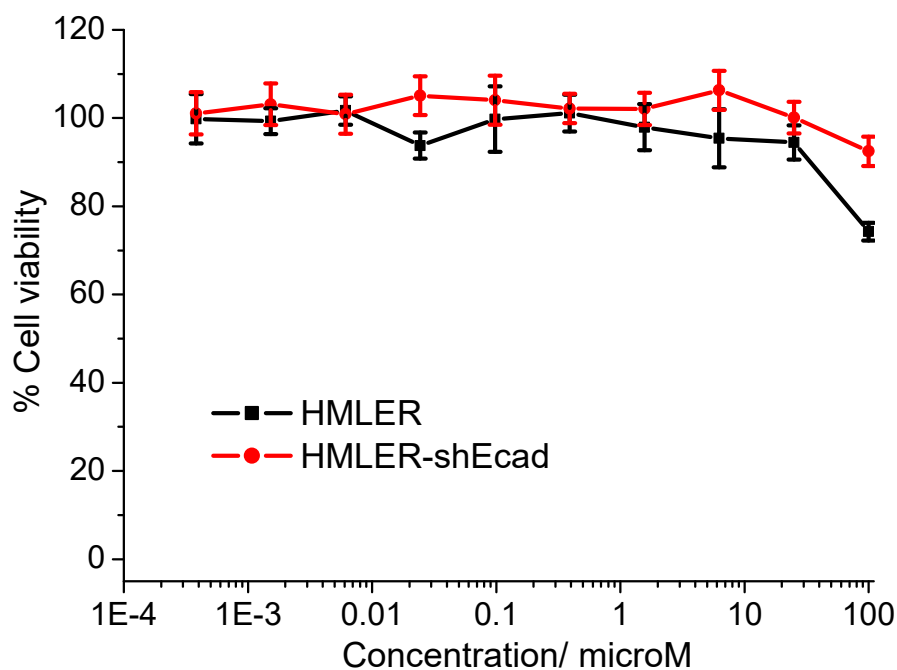

**Figure S15.** Representative dose-response curves for the treatment of HMLER and HMLER-shEcad cells with sodium salicylate after 72 h incubation.

**Table S3.** IC<sub>50</sub> values of diclofenac, naproxen, and sodium salicylate against HMLER and HMLER-shEcad cells. <sup>1</sup>Determined after 72 h incubation (mean of three independent experiments ± SD). <sup>2</sup> Taken from references [1,2].

| Compound                | HMLER IC <sub>50</sub> [μM] <sup>1</sup> | HMLER-shEcad IC <sub>50</sub> [μM] <sup>1</sup> |
|-------------------------|------------------------------------------|-------------------------------------------------|
| diclofenac <sup>2</sup> | 69.50 ± 8.70                             | 54.74 ± 0.23                                    |
| naproxen <sup>2</sup>   | > 100                                    | > 100                                           |
| sodium salicylate       | > 100                                    | > 100                                           |

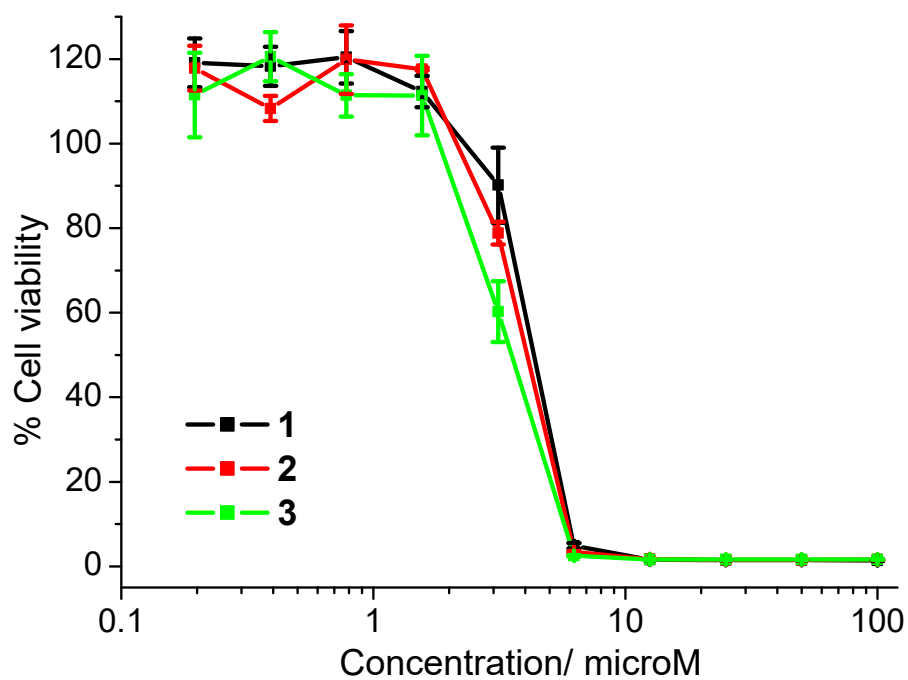

**Figure S16.** Representative dose-response curves for the treatment of BEAS-2B cells with **1-3** after 72 h incubation.

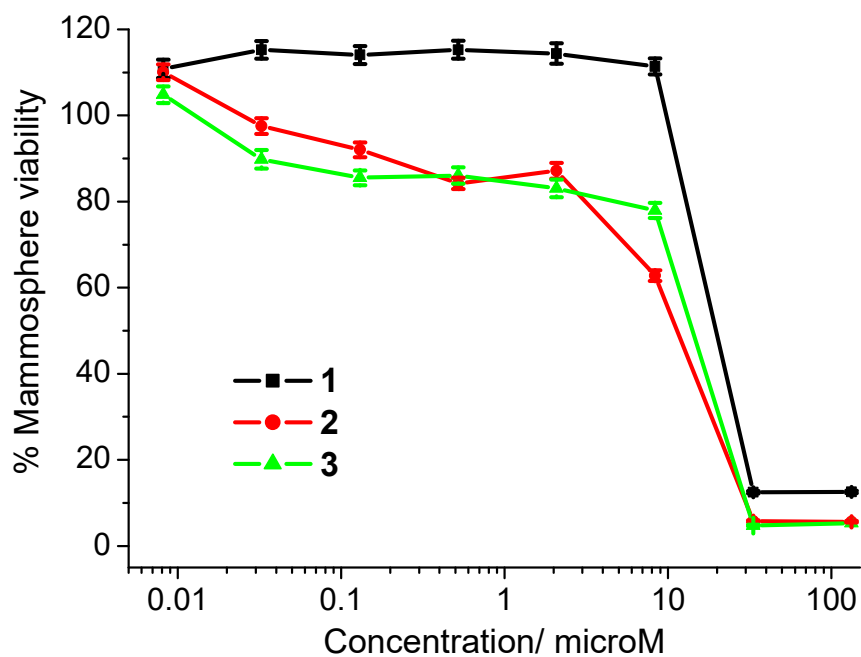

**Figure S17.** Representative dose-response curves for the treatment of HMLER-shEcad mammospheres with **1-3** after 5 days incubation.

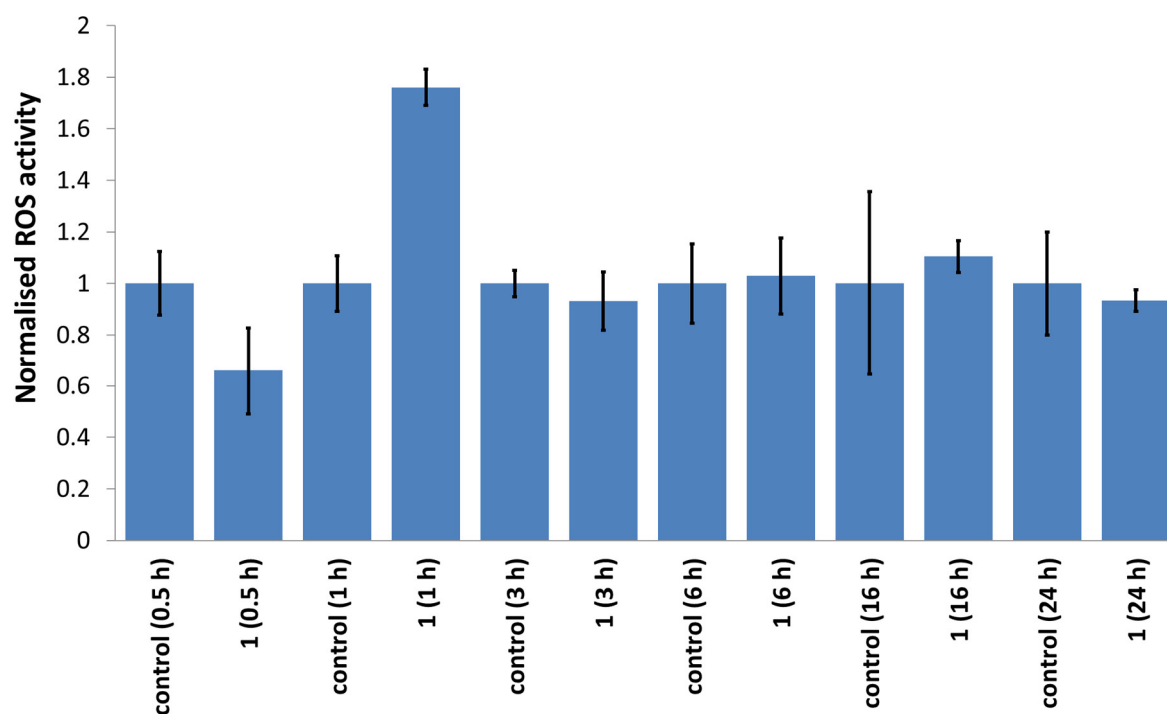

**Figure S18.** Normalised ROS activity in untreated HMLER-shEcad cells (control) and HMLER-shEcad cells treated with **1** ( $2 \times \text{IC}_{50}$  value, 0.5-24 h).

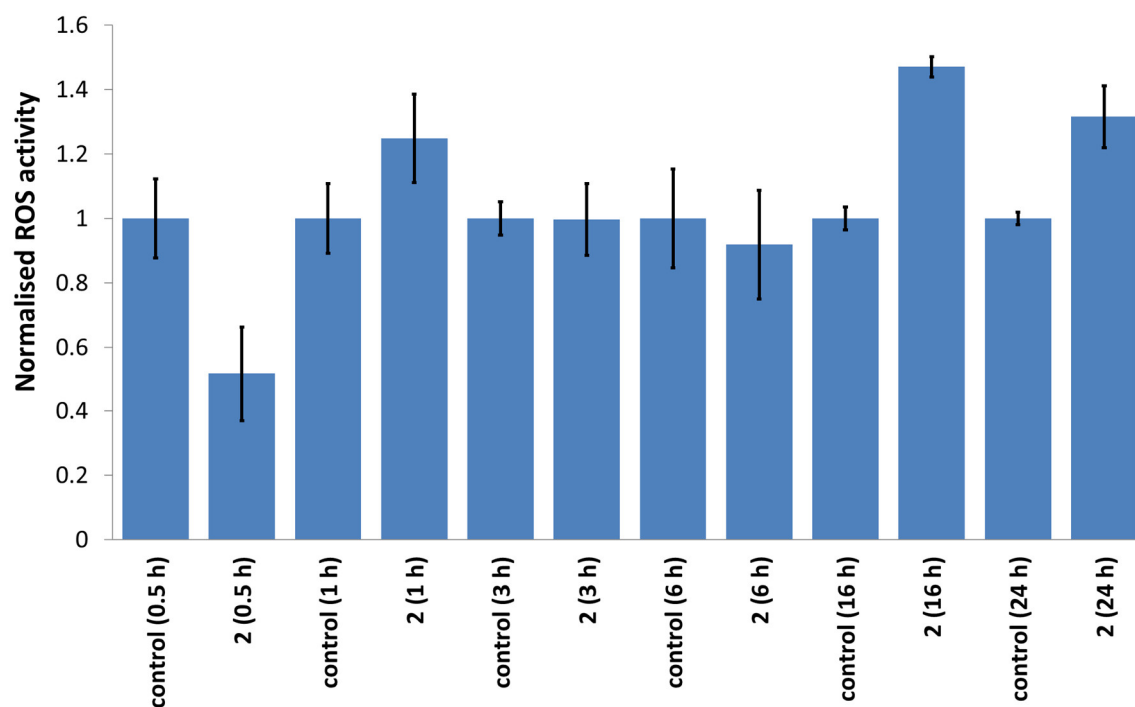

**Figure S19.** Normalised ROS activity in untreated HMLER-shEcad cells (control) and HMLER-shEcad cells treated with **2** ( $2 \times \text{IC}_{50}$  value, 0.5-24 h).

## References

1. Eskandari, A.; Boodram, J.N.; Cressey, P.B.; Lu, C.; Bruno, P.M.; Hemann, M.T.; Suntharalingam, K. The breast cancer stem cell potency of copper(II) complexes bearing nonsteroidal anti-inflammatory drugs and their encapsulation using polymeric nanoparticles. *Dalton Trans.* **2016**, *45*, 17867-17873.
2. Eskandari, A.; Suntharalingam, K. A reactive oxygen species-generating, cancer stem cell-potent manganese(II) complex and its encapsulation into polymeric nanoparticles. *Chem. Sci.* **2019**, *10*, 7792-7800.
